# Supplementary material
Source: HighWire-hosted journal article supplement (https://gh.bmj.com/content/2/4/e000496)
Supplement: inline-supplementary-material-3 [file inline-supplementary-material-3.docx]

**Tables**

**Table A1: Summary statistics by funding source for each year**

| Year | Stats | World Bank | Unicef | GovStats | Gfatm | PMI | TotalReceived | TotalPAR | StablePAR |
| --- | --- | --- | --- | --- | --- | --- | --- | --- | --- |
| 2006 | **N** | 94 | 94 | 94 | 94 | 94 | 94 | 94 | 94 |
|  | **Total** | 3.05E+07 | 5736640 | 4.42E+08 | 4.04E+08 | 6.41E+07 | 9.44E+08 | 3.20E+09 | 1.76E+09 |
|  | **mean** | 324460 | 61028.09 | 4705601 | 4297876 | 681425.5 | 1.00E+07 | 3.40E+07 | 1.87E+07 |
|  | **sd** | 959313 | 152761.6 | 9968769 | 1.01E+07 | 2065417 | 1.58E+07 | 1.29E+08 | 7.22E+07 |
|  | **p50** | 0 | 0 | 1149783 | 897750 | 0 | 4222194 | 6.34E+06 | 4264830 |
|  | **min** | 0 | 0 | 0 | 0 | 0 | 0 | 29857 | 0 |
|  | **max** | 4444445 | 760360 | 6.02E+07 | 7.01E+07 | 1.15E+07 | 8.27E+07 | 1.15E+09 | 6.82E+08 |
|  | **iqr** | 0 | 25640 | 3762500 | 3985298 | 0 | 9365286 | 2.04E+07 | 1.34E+07 |
| 2007 | **N** | 94 | 94 | 94 | 94 | 94 | 94 | 94 | 94 |
|  | **Total** | 1.30E+08 | 1.63E+07 | 5.96E+08 | 3.33E+08 | 1.87E+08 | 1.26E+09 | 3.20E+09 | 1.76E+09 |
|  | **mean** | 1379004 | 173843.2 | 6344326 | 3539619 | 1989574 | 1.34E+07 | 3.40E+07 | 1.87E+07 |
|  | **sd** | 6552523 | 457202.8 | 1.85E+07 | 5313694 | 5678845 | 2.23E+07 | 1.29E+08 | 7.22E+07 |
|  | **p50** | 0 | 0 | 1166432 | 1278063 | 0 | 4798503 | 6343171 | 4264830 |
|  | **min** | 0 | 0 | 0 | 0 | 0 | 0 | 29857 | 0 |
|  | **max** | 5.33E+07 | 3567740 | 1.57E+08 | 2.80E+07 | 3.10E+07 | 1.57E+08 | 1.15E+09 | 6.82E+08 |
|  | **iqr** | 0 | 114520 | 3998939 | 4508974 | 0 | 1.28E+07 | 2.04E+07 | 1.34E+07 |
| 2008 | **N** | 94 | 94 | 94 | 94 | 94 | 94 | 94 | 94 |
|  | **Total** | 1.11E+08 | 1.57E+07 | 5.21E+08 | 5.17E+08 | 2.74E+08 | 1.44E+09 | 3.20E+09 | 1.76E+09 |
|  | **mean** | 1177984 | 167214.3 | 5544612 | 5499178 | 2917670 | 1.53E+07 | 3.40E+07 | 1.87E+07 |
|  | **sd** | 5736124 | 469926.1 | 1.06E+07 | 8683741 | 7003946 | 2.04E+07 | 1.29E+08 | 7.22E+07 |
|  | **p50** | 0 | 0 | 1304445 | 2058433 | 0 | 7065113 | 6343171 | 4264830 |
|  | **min** | 0 | 0 | 7627 | 0 | 0 | 17595 | 29857 | 0 |
|  | **max** | 5.33E+07 | 2641720 | 6.02E+07 | 5.69E+07 | 3.37E+07 | 1.12E+08 | 1.15E+09 | 6.82E+08 |
|  | **iqr** | 0 | 31040 | 3875000 | 6134673 | 0 | 2.20E+07 | 2.04E+07 | 1.34E+07 |
| 2009 | **N** | 94 | 94 | 94 | 94 | 94 | 94 | 94 | 94 |
|  | **Total** | 1.09E+08 | 8488771 | 5.31E+08 | 1.02E+09 | 2.74E+08 | 1.94E+09 | 3.20E+09 | 1.76E+09 |
|  | **mean** | 1158392 | 90306.07 | 5648587 | 1.08E+07 | 2912766 | 2.06E+07 | 3.40E+07 | 1.87E+07 |
|  | **sd** | 5716252 | 257531.3 | 1.04E+07 | 2.83E+07 | 7028808 | 3.76E+07 | 1.29E+08 | 7.22E+07 |
|  | **p50** | 0 | 0 | 1432711 | 2460837 | 0 | 6658025 | 6343171 | 4264830 |
|  | **min** | 0 | 0 | 8770 | 0 | 0 | 9160 | 29857 | 0 |
|  | **max** | 5.33E+07 | 1424990 | 6.02E+07 | 2.24E+08 | 3.50E+07 | 2.85E+08 | 1.15E+09 | 6.82E+08 |
|  | **iqr** | 0 | 14720 | 5790000 | 6667270 | 0 | 2.39E+07 | 2.04E+07 | 1.34E+07 |
| 2010 | **N** | 94 | 94 | 94 | 94 | 94 | 94 | 94 | 94 |
|  | **Total** | 1029048 | 79486.45 | 6200505 | 9667954 | 5319149 | 2.23E+07 | 0.69259 | 0.54073 |
|  | **mean** | 5624035 | 212567.7 | 1.13E+07 | 1.44E+07 | 1.20E+07 | 2.71E+07 | 0.345142 | 0.410567 |
|  | **sd** | 0 | 0 | 1461554 | 2744510 | 0 | 9081325 | 0.811488 | 0.562851 |
|  | **p50** | 0 | 0 | 10087 | 0 | 0 | 172801 | 0.010843 | 0 |
|  | **min** | 5.33E+07 | 1318970 | 6.02E+07 | 5.87E+07 | 5.20E+07 | 1.25E+08 | 1.285635 | 1.123414 |
|  | **max** | 0 | 15450 | 4924628 | 10757622 | 0 | 30916775 | 0.602683 | 0.843276 |
|  | **iqr** | 94 | 94 | 94 | 94 | 94 | 94 | 94 | 94 |

**Table A2: Concentration Index, 2006-2010**

|  | **2006** | | | | **2007** | | | | | **2008** | | | | | |
| --- | --- | --- | --- | --- | --- | --- | --- | --- | --- | --- | --- | --- | --- | --- | --- |
| **CI** | **[95% confidence interval]** | | ***p-value*** | **CI** | **[95% confidence interval]** | | | ***p-value*** | **CI** | | **[95% confidence interval]** | | | ***p-value*** |
| **World Bank** | -0.399** | [-0.797 | -0.002] | 0.049 | -0.324* | [-0.705 | 0.058] | | 0.095 | -0.364** | | [-0.712 | | -0.015] | 0.041 |
| **Unicef** | -0.586*** | [-0.926 | -0.246] | 0.001 | -0.530*** | [-0.794 | -0.266] | | 0.000 | -0.432*** | | [-0.715 | | -0.150] | 0.003 |
| **PMI** | -0.376** | [-0.723 | -0.030] | 0.034 | -0.533*** | [-0.866 | -0.199] | | 0.002 | -0.561*** | | [-0.874 | | -0.249] | 0.001 |
| **Gfatm** | -0.127 | [-0.373 | 0.118] | 0.307 | -0.086 | [-0.296 | 0.123] | | 0.414 | -0.122 | | [-0.445 | | 0.201] | 0.456 |
| **GovStats** | 0.102 | [-0.114 | 0.319] | 0.351 | 0.14 | [-0.070 | 0.352] | | 0.189 | 0.155 | | [-0.058 | | 0.367] | 0.152 |
| **TotalReceived** | -0.051 | [-0.242 | 0.139] | 0.594 | -0.067 | [-0.223 | 0.089] | | 0.398 | -0.099 | | [-0.303 | | 0.104] | 0.335 |
| **TotalPAR** | -0.182*** | [-0.231 | -0.135] | 0.000 | -0.181*** | [-0.230 | -0.134] | | 0.000 | -0.181*** | | [-0.228 | | -0.133] | 0.000 |
| **StablePAR** | -0.289*** | [-0.359 | -0.219] | 0.000 | -0.293*** | [-0.362 | -0.224] | | 0.000 | -0.292*** | | [-0.362 | | -0.224] | 0.000 |
|  |  | **2009** |  |  |  | **2010** |  | |  |  | |  | |  |  |
|  | **CI** | **[95% confidence interval]** | | ***p-value*** | **CI** | **[95% confidence interval]** | | | ***p-value*** |  | |  | |  |  |
| **World Bank** | -0.352* | [-0.707 | 0.003] | 0.052 | -0.323* | [-0.706 | 0.059] | | 0.097 |  | |  | |  |  |
| **Unicef** | -0.760*** | [-1.148 | -0.372] | 0.000 | -0.646*** | [-1.035 | -0.257] | | 0.001 |  | |  | |  |  |
| **PMI** | -0.553*** | [-0.874 | -0.249] | 0.001 | -0.535*** | [-0.860 | -0.860] | | 0.000 |  | |  | |  |  |
| **Gfatm** | -0.182 | [-0.453 | 0.088] | 0.183 | -0.291*** | [-0.480 | -0.102] | | 0.003 |  | |  | |  |  |
| **GovStats** | 0.209** | [0.013 | 0.405] | 0.037 | 0.042 | [-0.213 | 0.297] | | 0.743 |  | |  | |  |  |
| **TotalReceived** | -0.127 | [-0.320 | 0.066] | 0.194 | -0.237*** | [-0.383 | -0.091] | | 0.002 |  | |  | |  |  |
| **TotalPAR** | -0.179*** | [-0.226 | -0.131] | 0.000 | -0.178*** | [-0.225 | -0.131] | | 0.000 |  | |  | |  |  |
| **StablePAR** | -0.029*** | [-0.363 | -0.226] | 0.000 | -0.294*** | [-0.362 | -0.362] | | 0.000 |  | |  | |  |  |
| *p<.10 **p<.05 ***p<.01 | | |  |  |  |  |  | |  |  | |  | |  |  |  |  | |  |  | |  |  | |  |  |
|  | | | | | | | |  | | |  | |  | | | | |  | | |  | | |  | | |

**A3a-A3e Dominance Tables**

**Dominance of Concentration Curves for different sources of funding – between donors (**Rule=mca, Sign. Level= 5%, #points=19)

**A3a – 2006 A3b - 2007**

|  | Rule=mca, Sign. Level= 5%, #points=19 | | | | | |  |  |
| --- | --- | --- | --- | --- | --- | --- | --- | --- |
|  | **World**  **Bank** | **Unicef** | **PMI** | **Gfatm** | **GovStats** | **Total**  **Received** | **Total**  **PAR** | **Stable**  **PAR** |
| World  Bank | - | ND | ND | ND | World Bank | ND | World  Bank | ND |
| Unicef |  | - | ND | ND | Unicef | Unicef | Unicef | Unicef |
| PMI |  |  | - | ND | PMI | ND | PMI | ND |
| Gfatm |  |  |  | - | ND | ND | ND | ND |
| GovStats |  |  |  |  | - | ND | Total  PAR | Stable  PAR |
| Total Received |  |  |  |  |  | - | ND | ND |

|  | Rule=mca, Sign. Level= 5%, #points=19 | | | | | |  |  |
| --- | --- | --- | --- | --- | --- | --- | --- | --- |
|  | **World**  **Bank** | **Unicef** | **PMI** | **Gfatm** | **GovStats** | **Total**  **Received** | **Total**  **PAR** | **Stable**  **PAR** |
| World  Bank | - | Unicef | ND | ND | World  Bank | ND | World  Bank | ND |
| Unicef |  | - | ND | Unicef | Unicef | ND | ND | ND |
| PMI |  |  | - | ND | PMI | ND | PMI | ND |
| Gfatm |  |  |  | - | ND | ND | ND | Stable  PAR |
| GovStats |  |  |  |  | - | ND | Total  PAR | Stable  PAR |
| Total Received |  |  |  |  |  | - | ND | ND |

**A3c – 2008**

|  | Rule=mca, Sign. Level= 5%, #points=19 | | | | | |  |  |
| --- | --- | --- | --- | --- | --- | --- | --- | --- |
|  | **World**  **Bank** | **Unicef** | **PMI** | **Gfatm** | **GovStats** | **Total**  **Received** | **Total**  **PAR** | **Stable**  **PAR** |
| World Bank | - | ND | ND | ND | World  Bank | ND | World  Bank | ND |
| Unicef |  | - | ND | ND | Unicef | ND | Unicef | ND |
| PMI |  |  | - | ND | PMI | ND | PMI | ND |
| Gfatm |  |  |  | - | ND | ND | ND | ND |
| GovStats |  |  |  |  | - | ND | Total  PAR | Stable  PAR |
| Total Received |  |  |  |  |  | - | ND | ND |

**A3d – 2009 A3d - 2010**

|  | Rule=mca, Sign. Level= 5%, #points=19 | | | | | |  |  |
| --- | --- | --- | --- | --- | --- | --- | --- | --- |
|  | **World**  **Bank** | **Unicef** | **PMI** | **Gfatm** | **GovStats** | **Total**  **Received** | **Total**  **PAR** | **Stable**  **PAR** |
| World Bank | - | Unicef | ND | ND | World  Bank | ND | World  Bank | ND |
| Unicef |  | - | ND | Unicef | Unicef | Unicef | Unicef | Unicef |
| PMI |  |  | - | ND | PMI | ND | PMI | ND |
| Gfatm |  |  |  | - | Gfatm | ND | ND | ND |
| GovStats |  |  |  |  | - | Total  received | Total  PAR | Stable  PAR |
| Total Received |  |  |  |  |  | - | ND | ND |

|  | Rule=mca, Sign. Level= 5%, #points=19 | | | | | |  |  |
| --- | --- | --- | --- | --- | --- | --- | --- | --- |
|  | **World**  **Bank** | **Unicef** | **PMI** | **Gfatm** | **GovStats** | **Total**  **Received** | **Total**  **PAR** | **Stable**  **PAR** |
| World Bank | - | Unicef | ND | ND | World  Bank | ND | World  Bank | ND |
| Unicef |  | - | ND | ND | Unicef | ND | Unicef | ND |
| PMI |  |  | - | ND | ND | ND | PMI | ND |
| Gfatm |  |  |  | - | ND | ND | ND | ND |
| GovStats |  |  |  |  | - | ND | ND | Stable  PAR |
| Total Received |  |  |  |  |  | - | ND | ND |

**A4a-A4f Dominance Tables**

**Dominance of Concentration Curves for different sources of funding – between years** (Rule=mca, Sign. Level= 5%, #points=19)

**Table A4a- World Bank Table A4b- UNICEF**

|  | 2006 | 2007 | 2008 | 2009 | 2010 |
| --- | --- | --- | --- | --- | --- |
| 2006 | - | ND | ND | ND | ND |
| 2007 |  | - | ND | ND | ND |
| 2008 |  |  | - | ND | ND |
| 2009 |  |  |  | - | ND |
| 2010 |  |  |  |  | - |

|  | 2006 | 2007 | 2008 | 2009 | 2010 |
| --- | --- | --- | --- | --- | --- |
| 2006 | - | ND | ND | ND | ND |
| 2007 |  | - | ND | ND | ND |
| 2008 |  |  | - | ND | ND |
| 2009 |  |  |  | - | ND |
| 2010 |  |  |  |  | - |

**Table A4c- PMI Table A4d- GFATM**

|  | 2006 | 2007 | 2008 | 2009 | 2010 |
| --- | --- | --- | --- | --- | --- |
| 2006 | - | ND | ND | ND | ND |
| 2007 |  | - | ND | ND | ND |
| 2008 |  |  | - | ND | ND |
| 2009 |  |  |  | - | ND |
| 2010 |  |  |  |  | - |

|  | 2006 | 2007 | 2008 | 2009 | 2010 |
| --- | --- | --- | --- | --- | --- |
| 2006 | - | ND | ND | ND | ND |
| 2007 |  | - | ND | ND | ND |
| 2008 |  |  | - | ND | ND |
| 2009 |  |  |  | - | ND |
| 2010 |  |  |  |  | - |

**Table A4e- GovStats Table A4f- Total received**

|  | 2006 | 2007 | 2008 | 2009 | 2010 |
| --- | --- | --- | --- | --- | --- |
| 2006 | - | ND | ND | ND | ND |
| 2007 |  | - | ND | ND | ND |
| 2008 |  |  | - | ND | ND |
| 2009 |  |  |  | - | ND |
| 2010 |  |  |  |  | - |

|  | 2006 | 2007 | 2008 | 2009 | 2010 |
| --- | --- | --- | --- | --- | --- |
| 2006 | - | ND | ND | ND | ND |
| 2007 |  | - | ND | ND | ND |
| 2008 |  |  | - | ND | ND |
| 2009 |  |  |  | - | ND |
| 2010 |  |  |  |  | - |

**Table A5: Health Inequity Index, 2006-2010**

|  | **2006** | | | | **2007** | | | | **2008** | | | |
| --- | --- | --- | --- | --- | --- | --- | --- | --- | --- | --- | --- | --- |
| **HII** | **[95% confidence interval]** | | ***p-value*** | **HII** | **[95% confidence interval]** | | ***p-value*** | **HII** | **[95% confidence interval]** | | ***p-value*** |
| **World Bank** | -0.217 | [-0.607 | 0.174] | 0.273 | -0.142 | [-0.518 | 0.234] | 0.456 | -0.183 | [-0.524 | 0.159] | 0.29 |
| **Unicef** | -0.403** | [-0.740 | -0.067] | 0.019 | -0.347** | [-0.612 | -0.083] | 0.010 | -0.251* | [-0.534 | 0.031] | 0.081 |
| **PMI** | -0.194 | [-0.535 | 0.147] | 0.261 | -0.351** | [-0.684 | -0.018] | 0.039 | -0.380** | [-0.691 | -0.070] | 0.017 |
| **Gfatm** | 0.056 | [-0.182 | 0.293] | 0.644 | 0.095 | [-0.106 | 0.297] | 0.349 | 0.059 | [-0.256 | 0.375] | 0.711 |
| **GovStats** | 0.285*** | [0.072 | 0.498] | 0.009 | 0.323*** | [0.114 | 0.532] | 0.003 | 0.335*** | [0.131 | 0.539] | 0.002 |
| **TotalReceived** | 0.131 | [-0.052 | 0.314] | 0.158 | 0.115 | [-0.034 | 0.265] | 0.129 | 0.082 | [-0.112 | 0.276] | 0.406 |
|  | **2009** | | | | **2010** | | | |  |  |  |  |
|  | **HII** | **[95% confidence interval]** | | ***p-value*** | **HII** | **[95% confidence interval]** | | ***p-value*** |  |  |  |  |
| **World Bank** | -0.173 | [-0.521 | 0.175] | 0.327 | -0.145 | [-0.521 | 0.230] | 0.444 |  |  |  |  |
| **Unicef** | -0.580*** | [-0.973 | -0.188] | 0.004 | -0.468** | [-0.858 | -0.079] | 0.019 |  |  |  |  |
| **PMI** | -0.374** | [-0.680 | -0.069] | 0.017 | -0.357** | [-0.646 | -0.068] | 0.016 |  |  |  |  |
| **Gfatm** | -0.004 | [-0.268 | 0.261] | 0.978 | -0.113 | [-0.293 | 0.067] | 0.217 |  |  |  |  |
| **GovStats** | 0 .388*** | [0.199 | 0.577] | 0.000 | 0.220* | [-0.029 | 0.469] | 0.082 |  |  |  |  |
| **TotalReceived** | 0.051 | [-0.134 | 0.237] | 0.584 | -0.059 | [-0.195 | 0.077] | 0.391 |  |  |  |  |
| *p<.10 **p<.05 ***p<.01 | | | | | | | | | | | | |

**Table A6: Robustness tests - Concentration Index, 2006-2010**

|  | **2006** | | | | **2007** | | | | **2008** | | | |
| --- | --- | --- | --- | --- | --- | --- | --- | --- | --- | --- | --- | --- |
| **CI** | **[95% confidence interval]** | | ***p-value*** | **CI** | **[95% confidence interval]** | | ***p-value*** | **CI** | **[95% confidence interval]** | | ***p-value*** |
| **World Bank** | -0.396* | [-0.792 | -0.001] | 0.049 | -0.316 | [-0.718 | 0.086] | 0.122 | -0.364** | [-0.708 | -0.019] | 0.039 |
| **Unicef** | -0.591*** | [-0.924 | -0.258] | 0.001 | -0.439*** | [-0.728 | -0.151] | 0.003 | -0.405** | [-0.774 | -0.036] | 0.032 |
| **PMI** | -0.389** | [-0.726 | -0.053] | 0.024 | -0.558*** | [-0.933 | -0.183] | 0.004 | -0.566*** | [-0.876 | -0.256] | 0.000 |
| **Gfatm** | 0.185 | [-0.238 | 0.608] | 0.388 | 0.261 | [-0.209 | 0.732] | 0.273 | 0.129 | [-0.248 | 0.506] | 0.498 |
| **GovStats** | 0.581*** | [0.251 | 0.912] | 0.001 | 0.572*** | [0.257 | 0.887] | 0.001 | 0.563*** | [0.248 | 0.877] | 0.001 |
| **TotalReceived** | 0.397*** | [0.106 | 0.688] | 0.008 | 0.374** | [0.090 | 0.658] | 0.010 | 0.291** | [0.041 | 0.541] | 0.023 |
|  | **2009** | | | | **2010** | | | |  |  |  |  |
|  | **CI** | **[95% confidence interval]** | | ***p-value*** | **CI** | **[95% confidence interval]** | | ***p-value*** |  |  |  |  |
| **World Bank** | -0.352* | [-0.703 | -0.001] | 0.049 | -0.319 | [-0.700 | 0.062] | 0.100 |  |  |  |  |
| **Unicef** | -0.762*** | [-1.172 | -0.353] | 0.000 | -0.634*** | [-1.008 | -0.260] | 0.001 |  |  |  |  |
| **PMI** | -0.560*** | [-0.866 | -0.253] | 0.000 | -0.539*** | [-0.824 | -0.255] | 0.000 |  |  |  |  |
| **Gfatm** | 0.152 | [-0.287 | 0.591] | 0.493 | -0.056 | [-0.326 | 0.214] | 0.681 |  |  |  |  |
| **GovStats** | 0.583*** | [0.253 | 0.912] | 0.001 | 0.485*** | [0.204 | 0.766] | 0.001 |  |  |  |  |
| **TotalReceived** | 0.284* | [-0.013 | 0.581] | 0.061 | 0.131 | [-0.070 | 0.333] | 0.199 |  |  |  |  |
| *p<.10 **p<.05 ***p<.01 | | | | | | | | | | | | |

**Table A7: Robustness checks - Health Inequity Index, 2006-2010**

|  | **2006** | | | | **2007** | | | | **2008** | | | |
| --- | --- | --- | --- | --- | --- | --- | --- | --- | --- | --- | --- | --- |
| **HII** | **[95% confidence interval]** | | ***p-value*** | **HII** | **[95% confidence interval]** | | ***p-value*** | **HHI** | **[95% confidence interval]** | | ***p-value*** |
| **World Bank** | -0.214 | [-0.603 | 0.175] | 0.278 | -0.134 | [-0.531 | 0.263] | 0.504 | -0.183 | [-0.521 | 0.156] | 0.286 |
| **Unicef** | -0.408** | [-0.738 | -0.078] | 0.016 | -0.257* | [-0.549 | 0.035] | 0.084 | -0.224 | [-0.597 | 0.149] | 0.236 |
| **PMI** | -0.207 | [-0.538 | 0.125] | 0.218 | -0.376* | [-0.753 | 0.000] | 0.050 | -0.385** | [-0.696 | -0.075] | 0.016 |
| **Gfatm** | 0.367* | [-0.062 | 0.797] | 0.093 | 0.443* | [-0.036 | 0.922] | 0.069 | 0.310 | [-0.072 | 0.692] | 0.111 |
| **GovStats** | 0.764*** | [0.418 | 1.110] | 0.000 | 0.754*** | [0.423 | 1.085] | 0.000 | 0.744*** | [0.415 | 1.073] | 0.000 |
| **TotalReceived** | 0.580*** | [0.275 | 0.884] | 0.000 | 0.556*** | [0.257 | 0.855] | 0.000 | 0.472*** | [0.209 | 0.734] | 0.001 |
|  | **2009** | | | | **2010** | | | |  |  |  |  |
|  | **HII** | **[95% confidence interval]** | | ***p-value*** | **HII** | **[95% confidence interval]** | | ***p-value*** |  |  |  |  |
| **World Bank** | -0.173 | [-0.518 | 0.171] | 0.320 | -0.141 | [-0.515 | 0.233] | 0.456 |  |  |  |  |
| **Unicef** | -0.584*** | [-0.997 | -0.170] | 0.006 | -0.456** | [-0.831 | -0.081] | 0.018 |  |  |  |  |
| **PMI** | -0.381** | [-0.688 | -0.074] | 0.016 | -0.362** | [-0.646 | -0.077] | 0.013 |  |  |  |  |
| **Gfatm** | 0.331 | [-0.116 | 0.778] | 0.145 | 0.122 | [-0.153 | 0.396] | 0.380 |  |  |  |  |
| **GovStats** | 0.762*** | [0.417 | 1.106] | 0.000 | 0.663*** | [0.367 | 0.958] | 0.000 |  |  |  |  |
| **TotalReceived** | 0.463*** | [0.153 | 0.772] | 0.004 | 0.309*** | [0.096 | 0.522] | 0.005 |  |  |  |  |
| *p<.10 **p<.05 ***p<.01 | | | | | | | | | | | | |

**Table A8: Kakwani indices of progressivity of malaria funding, 2006-2010**

|  | **2006** | | | | **2007** | | | | **2008** | | | |
| --- | --- | --- | --- | --- | --- | --- | --- | --- | --- | --- | --- | --- |
| **KI** | **[95% confidence interval]** | | ***p-value*** | **KI** | **[95% confidence interval]** | | ***p-value*** | **KI** | **[95% confidence interval]** | | ***p-value*** |
| **World Bank** | -0.932*** | [-1.339 | -0.524] | 0.000 | -0.860*** | [-1.256 | -0.464] | 0.000 | -0.904*** | [-1.268 | -0.540] | 0.000 |
| **Unicef** | -1.118*** | [-1.462 | -0.775] | 0.000 | -1.066*** | [-1.332 | -0.800] | 0.000 | -0.973*** | [-1.269 | -0.677] | 0.000 |
| **PMI** | -0.909*** | [-1.268 | -0.549] | 0.000 | -1.069*** | [-1.408 | -0.730] | 0.000 | -1.102*** | [-1.420 | -0.783] | 0.000 |
| **Gfatm** | -0.659*** | [-0.893 | -0.426] | 0.000 | -0.623*** | [-0.838 | -0.408] | 0.000 | -0.662*** | [-0.968 | -0.356] | 0.000 |
| **GovStats** | -0.430*** | [-0.655 | -0.205] | 0.000 | -0.396*** | [-0.616 | -0.176] | 0.000 | -0.386*** | [-0.591 | -0.180] | 0.000 |
| **TotalReceived** | -0.584*** | [-0.772 | -0.396] | 0.000 | -0.603*** | [-0.769 | -0.437] | 0.000 | -0.639*** | [-0.829 | -0.450] | 0.000 |
|  | **2009** | | | | **2010** | | | |  |  |  |  |
|  | **KI** | **[95% confidence interval]** | | ***p-value*** | **KI** | **[95% confidence interval]** | | ***p-value*** |  |  |  |  |
| **World Bank** | -0.886*** | [-1.256 | -0.515] | 0.000 | -0.853*** | [-1.250 | -0.457] | 0.000 |  |  |  |  |
| **Unicef** | -1.294*** | [-1.679 | -0.909] | 0.000 | -1.176*** | [-1.564 | -0.788] | 0.000 |  |  |  |  |
| **PMI** | -1.087*** | [-1.401 | -0.773] | 0.000 | -1.065*** | [-1.362 | -0.769] | 0.000 |  |  |  |  |
| **Gfatm** | -0.717*** | [-0.991 | -0.442] | 0.000 | -0.821*** | [-1.004 | -0.638] | 0.000 |  |  |  |  |
| **GovStats** | -0.325*** | [-0.520 | -0.130] | 0.001 | -0.488*** | [-0.743 | -0.233] | 0.000 |  |  |  |  |
| **TotalReceived** | -0.661*** | [-0.860 | -0.463] | 0.000 | -0.767*** | [-0.912 | -0.622] | 0.000 |  |  |  |  |
| *p<.10 **p<.05 ***p<.01 | | | | | | | | | | | | |
